# Supplementary material for: Trimester-Specific Assessment of Diet Quality in a Sample of Canadian Pregnant Women
Source: MDPI journal article supplement (doi:10.3390/ijerph16030311), 2019-01-24
Supplement: s1 [file s1]

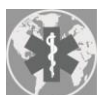

**Table S1.** Components of Canadian adaptation of Healthy Eating Index, range of scores and scoring criteria.

| Component                        | Maximum Points | Scoring criteria (daily servings) * |                            |
|----------------------------------|----------------|-------------------------------------|----------------------------|
|                                  |                | Minimum score                       | Maximum score              |
| <b>Adequacy</b> †                | <b>60</b>      |                                     |                            |
| Total vegetables and fruits      | 10             | 0                                   | 4 to 10 servings           |
| Whole fruits                     | 5              | 0                                   | 0.8 to 2.1 servings        |
| Dark green and orange vegetables | 5              | 0                                   | 0.8 to 2.1 servings        |
| Total grain products             | 5              | 0                                   | 3 to 8 servings            |
| Whole grains                     | 5              | 0                                   | 1.5 to 4 servings          |
| Milk and alternatives            | 10             | 0                                   | 2 to 4 servings            |
| Meat and alternatives            | 10             | 0                                   | 1 to 3 servings            |
| Unsaturated fats                 | 10             | 0                                   | 30 to 45 grams/day §       |
| <b>Moderation</b> ‡              | <b>40</b>      |                                     |                            |
| Saturated fats                   | 10             | ≥15% of total energy intake         | ≤7% of total energy intake |
| Sodium                           | 10             | twice the UL (4600 mg)              | AI or less (≤1500 mg)      |
| Other foods                      | 20             | ≥40% of total energy intake         | ≤5% of total energy intake |

Adapted from Garriguet D. (2009); UL, Upper Intake limit; AI, Adequate intake. \* according to age and sex, as specified in Canada's Food Guide. † for adequacy components, 0 points for minimum intake or less, 5, 10 or 20 for maximum intake or more, and proportional for amounts between minimum and maximum. ‡ for moderation components, 10 or 20 points for minimum intake or less, 0 points for maximum intake or more, and proportional for amounts between minimum and maximum. § Refers only to the amount of unsaturated fats added directly to food during cooking or through salad dressings and does not represent total dietary intake of unsaturated fats.

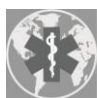

**Table S2.** Frequency of nausea and vomiting among participants.

|                      | N (%)         |               |               |
|----------------------|---------------|---------------|---------------|
|                      | 1st trimester | 2nd trimester | 3rd trimester |
| Experienced nausea   | 70 (88.6)     | 26 (32.9)     | 16 (20.3)     |
| >2 times/day         | 37 (46.8)     | 3 (3.8)       | 0             |
| 1 time/day           | 10 (12.7)     | 1 (1.3)       | 5 (6.3)       |
| 3 to 6 times/week    | 10 (12.7)     | 6 (7.6)       | 1 (1.3)       |
| 1 to 2 times/week    | 2 (2.5)       | 6 (7.6)       | 2 (2.5)       |
| Occasionally         | 10 (12.7)     | 4 (5.1)       | 4 (5.1)       |
| Rarely               | 1 (1.3)       | 6 (7.6)       | 4 (5.1)       |
| Experienced vomiting | 25 (31.7)     | 15 (19.0)     | 2 (2.5)       |
| >2 times/day         | 2 (2.5)       | 1 (1.3)       | 0             |
| 1 time/day           | 4 (5.1)       | 0             | 0             |
| 3 to 6 times/week    | 1 (1.3)       | 1 (1.3)       | 0             |
| 1 to 2 times/week    | 2 (2.5)       | 4 (5.1)       | 0             |
| Occasionally         | 10 (12.7)     | 3 (3.8)       | 1 (1.3)       |
| Rarely               | 6 (7.6)       | 6 (7.6)       | 1 (1.3)       |

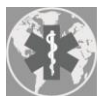

**Table S3.** Food cravings and aversions among participants.

|                                        |                                                     | N (%)           |                 |                 |
|----------------------------------------|-----------------------------------------------------|-----------------|-----------------|-----------------|
|                                        |                                                     | 1 <sup>st</sup> | 2 <sup>nd</sup> | 3 <sup>rd</sup> |
|                                        |                                                     | trimester       | trimester       | trimester       |
| Number of women who reported cravings  |                                                     | 44 (55.7)       | 33 (41.8)       | 25 (31.7)       |
| Sweet                                  | Chocolate, sweets, ice cream, soft drinks, desserts | 23 (29.1)       | 22 (27.8)       | 20 (25.3)       |
| Fruit                                  | Fruit, fruit juice                                  | 11 (13.9)       | 13 (16.5)       | 8 (10.1)        |
| Dairy                                  | Milk, yoghurt, cheese, cream                        | 17 (21.5)       | 5 (6.3)         | 5 (6.3)         |
| Proteins                               | Meat, poultry, fish, eggs                           | 6 (7.6)         | 3 (3.8)         | 4 (5.1)         |
| Carbohydrates                          | Cereal, bread, pasta, potatoes                      | 13 (16.5)       | 4 (5.1)         | 2 (2.5)         |
| Salty snacks                           | Crisps, hummus, nuts, olives, condiments            | 17 (21.5)       | 5 (6.3)         | 5 (6.3)         |
| Pickles                                | Pickles                                             | 4 (5.1)         | 0               | 0               |
| Fast food                              | Pizza, burgers, fries, sushi, poutine               | 14 (17.7)       | 5 (6.3)         | 4 (5.1)         |
| Vegetables                             | Vegetables, salads, soups                           | 8 (10.1)        | 5 (6.3)         | 2 (2.5)         |
| Number of women who reported aversions |                                                     | 50 (63.3)       | 28 (35.4)       | 17 (21.5)       |
| Sweet                                  | Chocolate, sweets, ice cream, soft drinks, desserts | 6 (7.6)         | 0               | 1 (1.3)         |
| Fruit                                  | Fruit, fruit juice                                  | 0               | 0               | 1 (1.3)         |
| Dairy                                  | Milk, yoghurt, cheese, cream                        | 3 (3.8)         | 0               | 0               |
| Proteins                               | Meat, poultry, fish, eggs                           | 33 (41.8)       | 22 (27.8)       | 14 (17.7)       |
| Carbohydrates                          | Cereal, bread, pasta, potatoes                      | 2 (2.5)         | 0               | 0               |
| Salty snacks                           | Crisps, hummus, nuts, olives, condiments            | 10 (12.7)       | 4 (5.1)         | 2 (2.5)         |
| Coffee and alcohol                     | Coffee, beer, wine, liquor                          | 9 (11.4)        | 4 (5.1)         | 3 (3.8)         |
| Fast food                              | Pizza, burgers, fries, sushi, poutine               | 3 (3.8)         | 0               | 2 (2.5)         |
| Vegetables                             | Vegetables, salads, soups                           | 14 (17.7)       | 3 (3.8)         | 2 (2.5)         |



**Table S4.** Proportions of vitamin- and mineral-supplement users among participants.

|                                                          | Proportion (%)            |                           |                           |
|----------------------------------------------------------|---------------------------|---------------------------|---------------------------|
|                                                          | 1 <sup>st</sup> trimester | 2 <sup>nd</sup> trimester | 3 <sup>rd</sup> trimester |
| ≥ 1 supplement (all types)                               | 86.1                      | 84.8                      | 78.5                      |
| Number of supplements (all types) taken during pregnancy |                           |                           |                           |
| 0                                                        | 13.9                      | 15.2                      | 21.5                      |
| 1                                                        | 68.4                      | 74.7                      | 64.6                      |
| 2                                                        | 10.1                      | 6.3                       | 11.4                      |
| 3 (Maximum)                                              | 7.6                       | 3.8                       | 2.5                       |
| Type of supplements most commonly taken                  |                           |                           |                           |
| Multivitamins                                            | 74.7                      | 77.2                      | 70.9                      |
| Folic acid supplement                                    | 16.5                      | 7.6                       | 5.1                       |
| Vitamin D supplement                                     | 7.6                       | 5.1                       | 3.8                       |
| Iron supplement                                          | 1.3                       | 0                         | 5.1                       |
| Omega-3 supplement (mostly EPA-DHA)                      | 5.1                       | 3.8                       | 5.1                       |
